# Supplementary material for: 5-O-(N-Boc-l-Alanine)-Renieramycin T Induces Cancer Stem Cell Apoptosis via Targeting Akt Signaling
Source: MDPI journal article supplement (doi:10.3390/md20040235), 2022-03-29
Supplement: s1 [file s1]

## Supporting Information

### 5-*O*-(*N*-Boc-*L*-Alanine)-Renieramycin T Induces Cancer Stem Cell Apoptosis via Targeting Akt signalling

Darintip Suksamai<sup>1,2</sup>, Satapat Racha<sup>3</sup>, Nicharat Sriratanasak<sup>1,4</sup>, Chatchai Chaotham<sup>1,5</sup>, Kanokpol Aphicho<sup>6</sup>, Aye Chan Khine Lin<sup>2,6</sup>, Chaisak Chansrinikom<sup>6,7</sup>, Khanit Suwanborirux<sup>6,7</sup>, Supakarn Chamni<sup>6,7</sup> and Pithi Chanvorachote<sup>1,4\*</sup>

- <sup>1</sup> Center of Excellence in Cancer Cell and Molecular Biology, Faculty of Pharmaceutical Sciences, Chulalongkorn University, Bangkok 10330, Thailand; pithi.c@chula.ac.th (P.C.); darintip.ss@gmail.com (D.S.); nicharat.sri@outlook.com (N.S.); cchoatham@gmail.com (C.C.)
- <sup>2</sup> Graduate Program of Pharmaceutical Science and Technology, Faculty of Pharmaceutical Science, Chulalongkorn University, Bangkok, Thailand; darintip.ss@gmail.com (D.S.); ayechan23792@gmail.com (A.L.)
- <sup>3</sup> Interdisciplinary Program in Pharmacology, Graduate School, Chulalongkorn University, Bangkok, Thailand; satapatto@gmail.com (S.R.)
- <sup>4</sup> Department of Pharmacology and Physiology, Faculty of Pharmaceutical Sciences, Chulalongkorn University, Bangkok 10330, Thailand; pithi.c@chula.ac.th (P.C.); nicharat.sri@outlook.com (N.S.)
- <sup>5</sup> Department of Biochemistry and Microbiology, Faculty of Pharmaceutical Sciences, Chulalongkorn University, 10330 Bangkok, Thailand; cchoatham@gmail.com (C.C.)
- <sup>6</sup> Natural Products and Nanoparticles Research Unit (NP<sup>2</sup>), Chulalongkorn University, Bangkok 10330, Thailand; kanokpol.ap@gmail.com (K.A.); ayechan23792@gmail.com (A.C.K.L.); chaisak.c@pharm.chula.ac.th (C.C.); khanit.s@chula.ac.th (K.S.); supakarn.c@pharm.chula.ac.th (S.C.)
- <sup>7</sup> Department of Pharmacognosy and Pharmaceutical Botany, Faculty of Pharmaceutical Sciences, Chulalongkorn University, Bangkok 10330, Thailand; chaisak.c@pharm.chula.ac.th (C.C.); khanit.s@chula.ac.th (K.S.); supakarn.c@pharm.chula.ac.th (S.C.)
- \* Correspondence: pithi.c@chula.ac.th; Tel.: +662-218-8344

| Content                                                                                                                                         | Page |
|-------------------------------------------------------------------------------------------------------------------------------------------------|------|
| <b>Figure S1</b> <sup>1</sup> H-NMR (400 MHz) spectrum of 5- <i>O</i> -( <i>N</i> -Boc- <i>L</i> -alanine)-renieramycin T in CDCl <sub>3</sub>  | S2   |
| <b>Figure S2</b> <sup>13</sup> C-NMR (400 MHz) spectrum of 5- <i>O</i> -( <i>N</i> -Boc- <i>L</i> -alanine)-renieramycin T in CDCl <sub>3</sub> | S3   |
| <b>Figure S3</b> COSY (400 MHz) spectrum of 5- <i>O</i> -( <i>N</i> -Boc- <i>L</i> -alanine)-renieramycin T in CDCl <sub>3</sub>                | S4   |
| <b>Figure S4</b> HSQC (400 MHz) spectrum of 5- <i>O</i> -( <i>N</i> -Boc- <i>L</i> -alanine)-renieramycin T in CDCl <sub>3</sub>                | S5   |
| <b>Figure S5</b> HMBC (400 MHz) spectrum of 5- <i>O</i> -( <i>N</i> -Boc- <i>L</i> -alanine)-renieramycin T in CDCl <sub>3</sub>                | S6   |

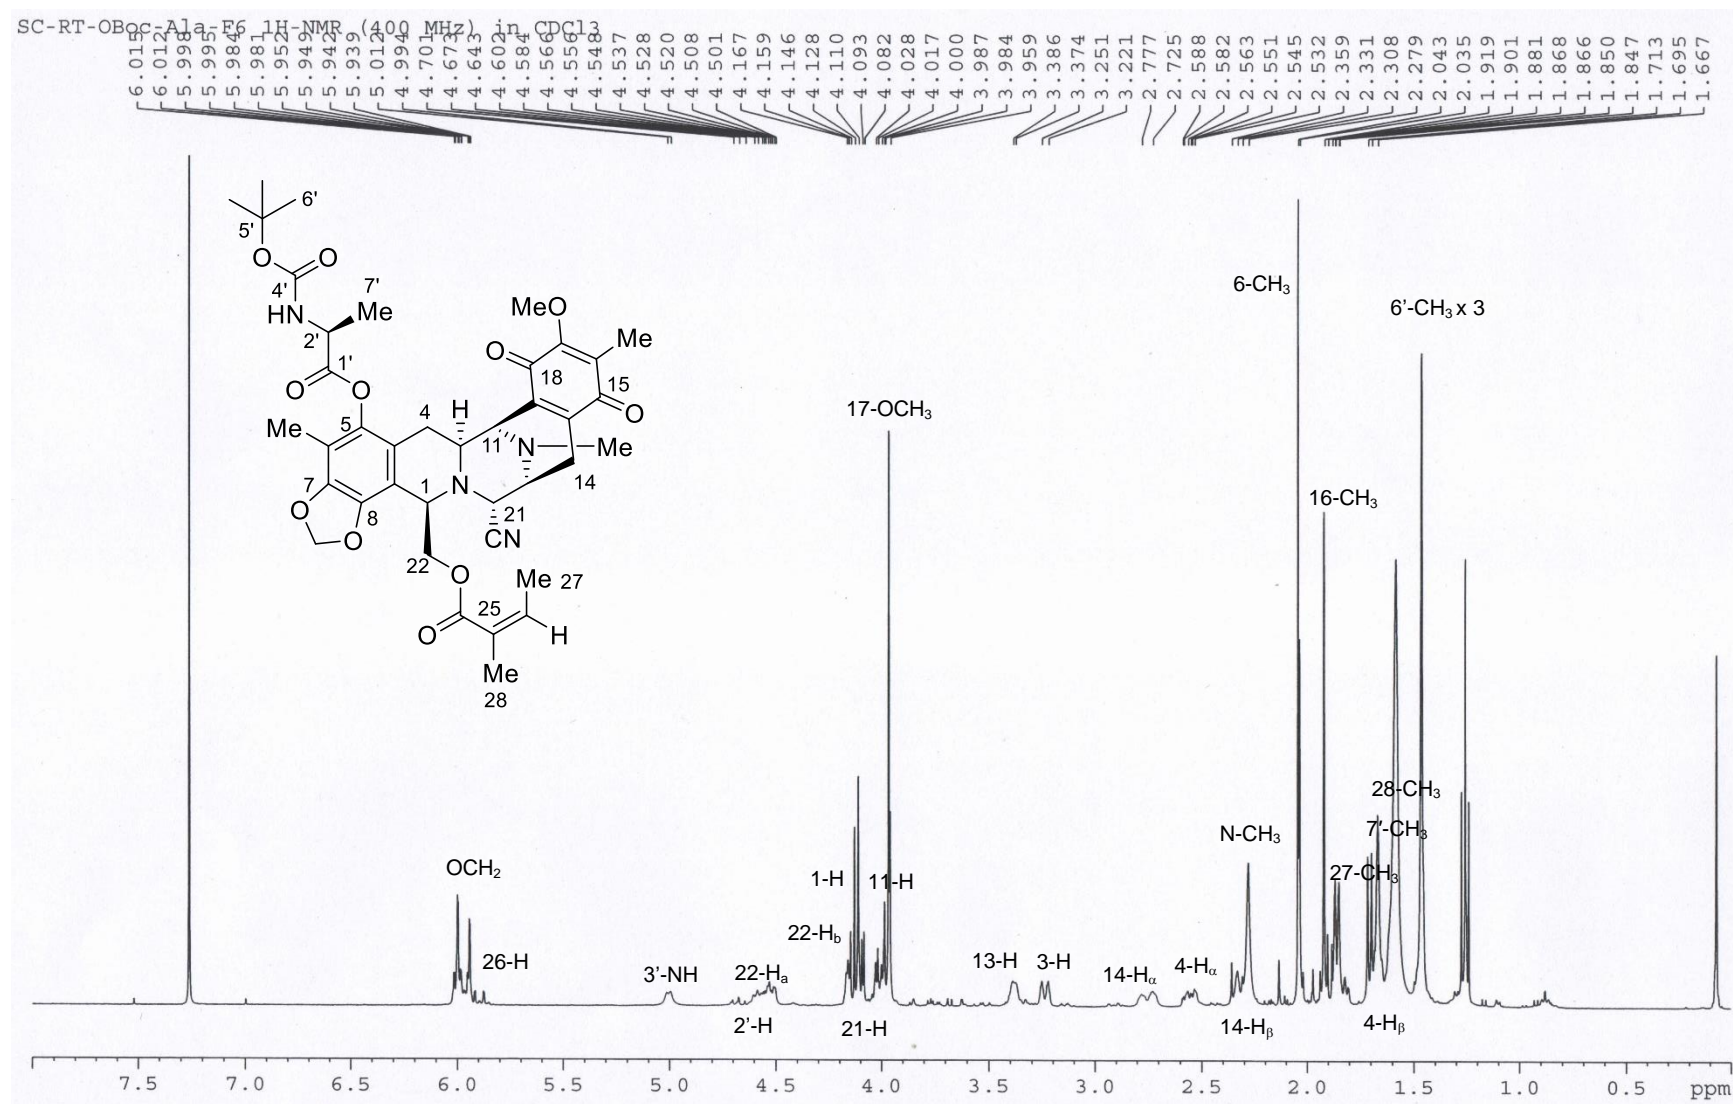

**Figure S1.** <sup>1</sup>H NMR (400 MHz) spectrum of 5-O-(N-Boc-L-alanine)-renieramycin T in CDCl<sub>3</sub>

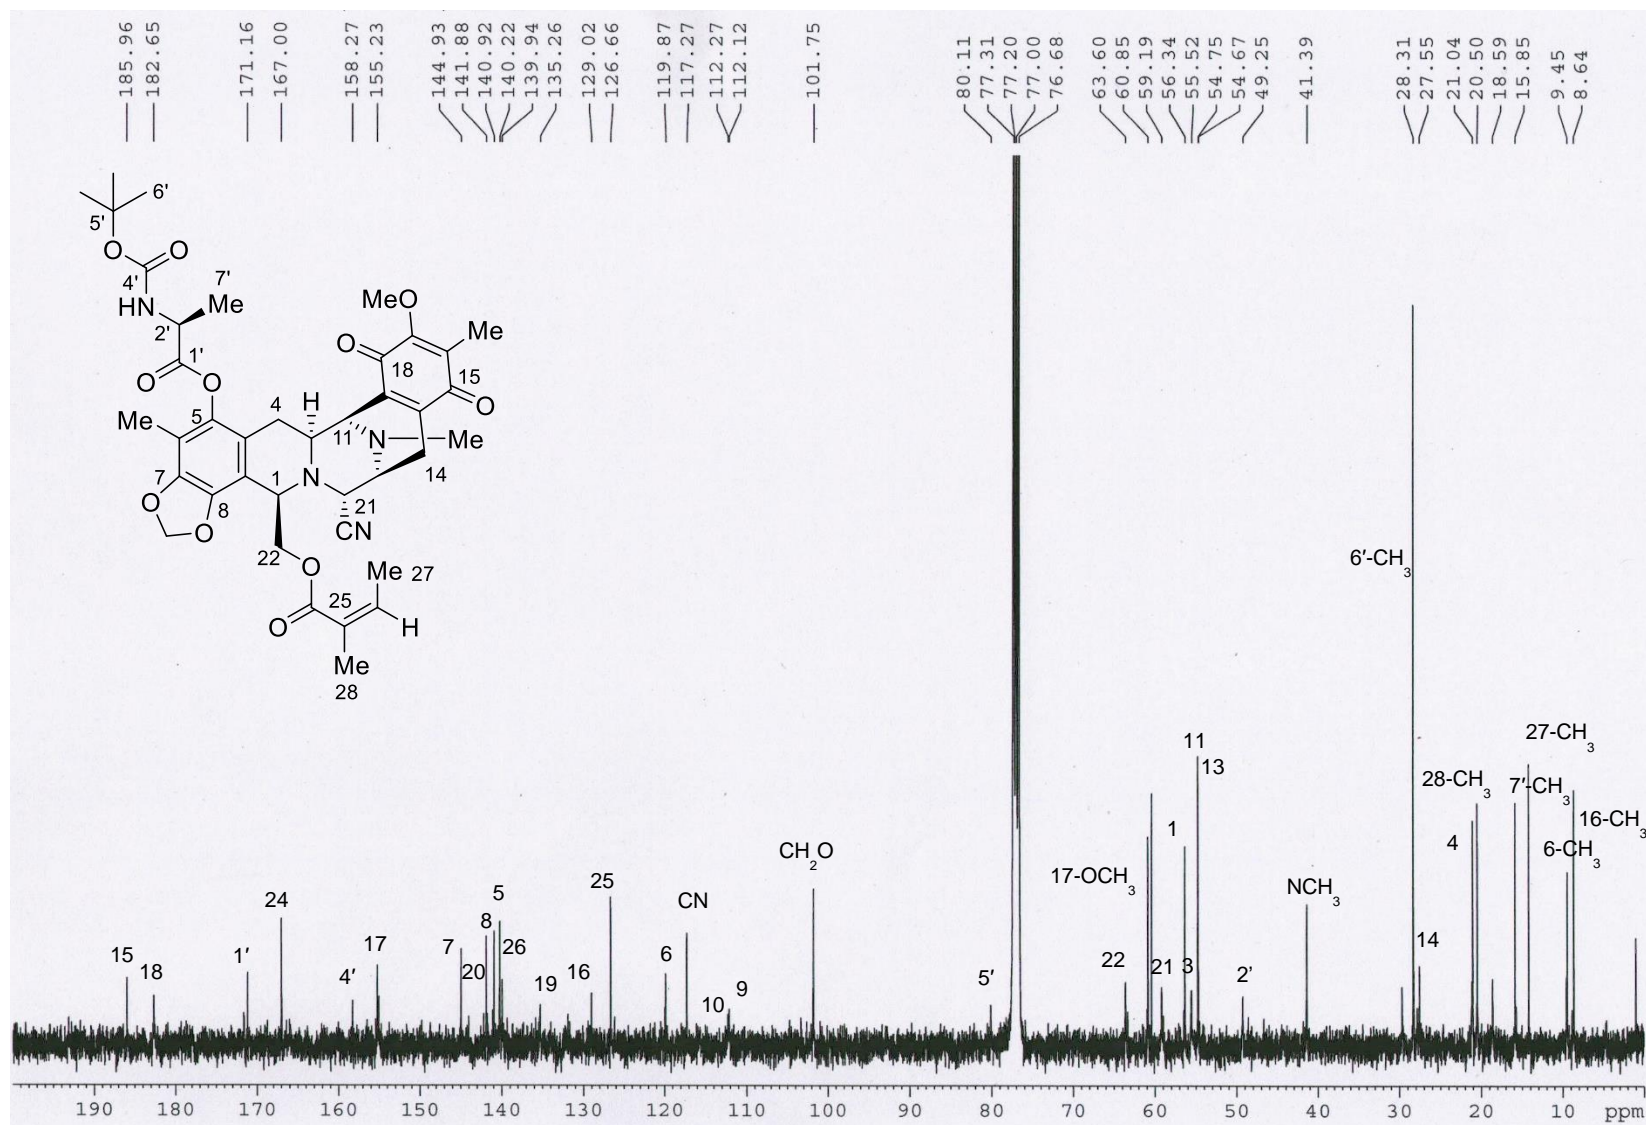

**Figure S2.** <sup>13</sup>C-NMR (400 MHz) spectrum of 5-O-(N-Boc-L-alanine)-renieramycin T in CDCl<sub>3</sub>

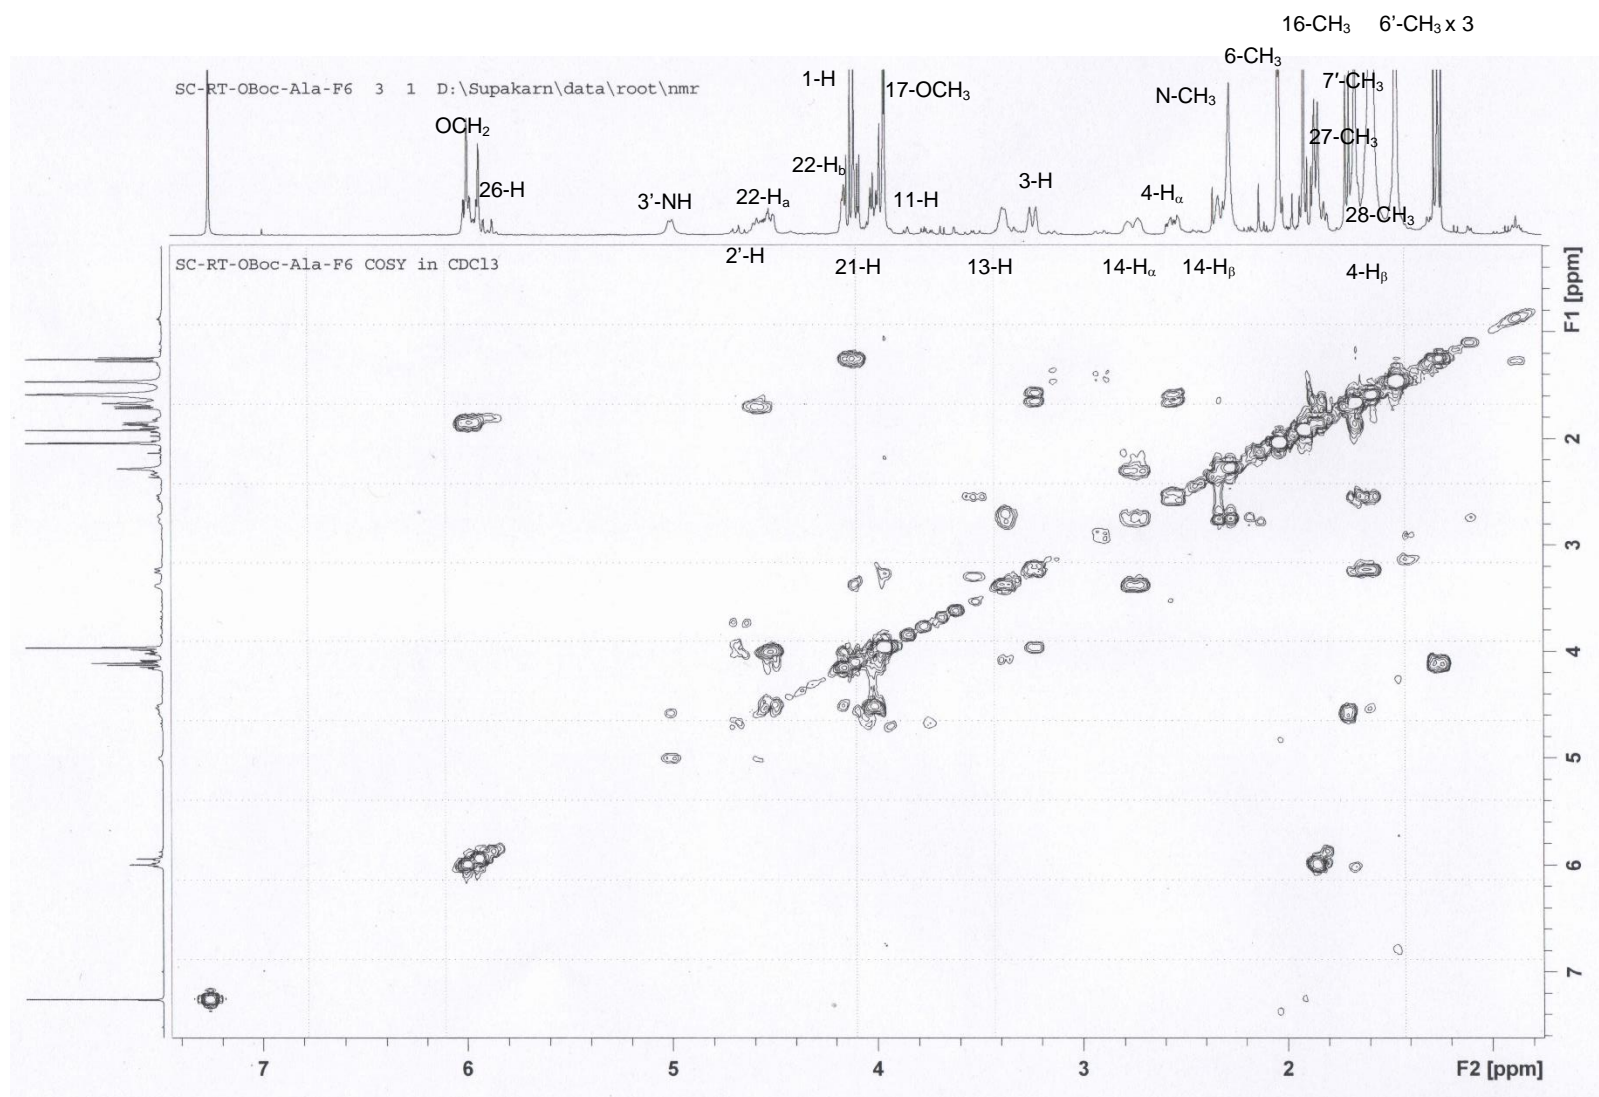

**Figure S3.** COSY (400 MHz) spectrum of 5-*O*-(*N*-Boc-*L*-alanine)-renieramycin T in CDCl<sub>3</sub>



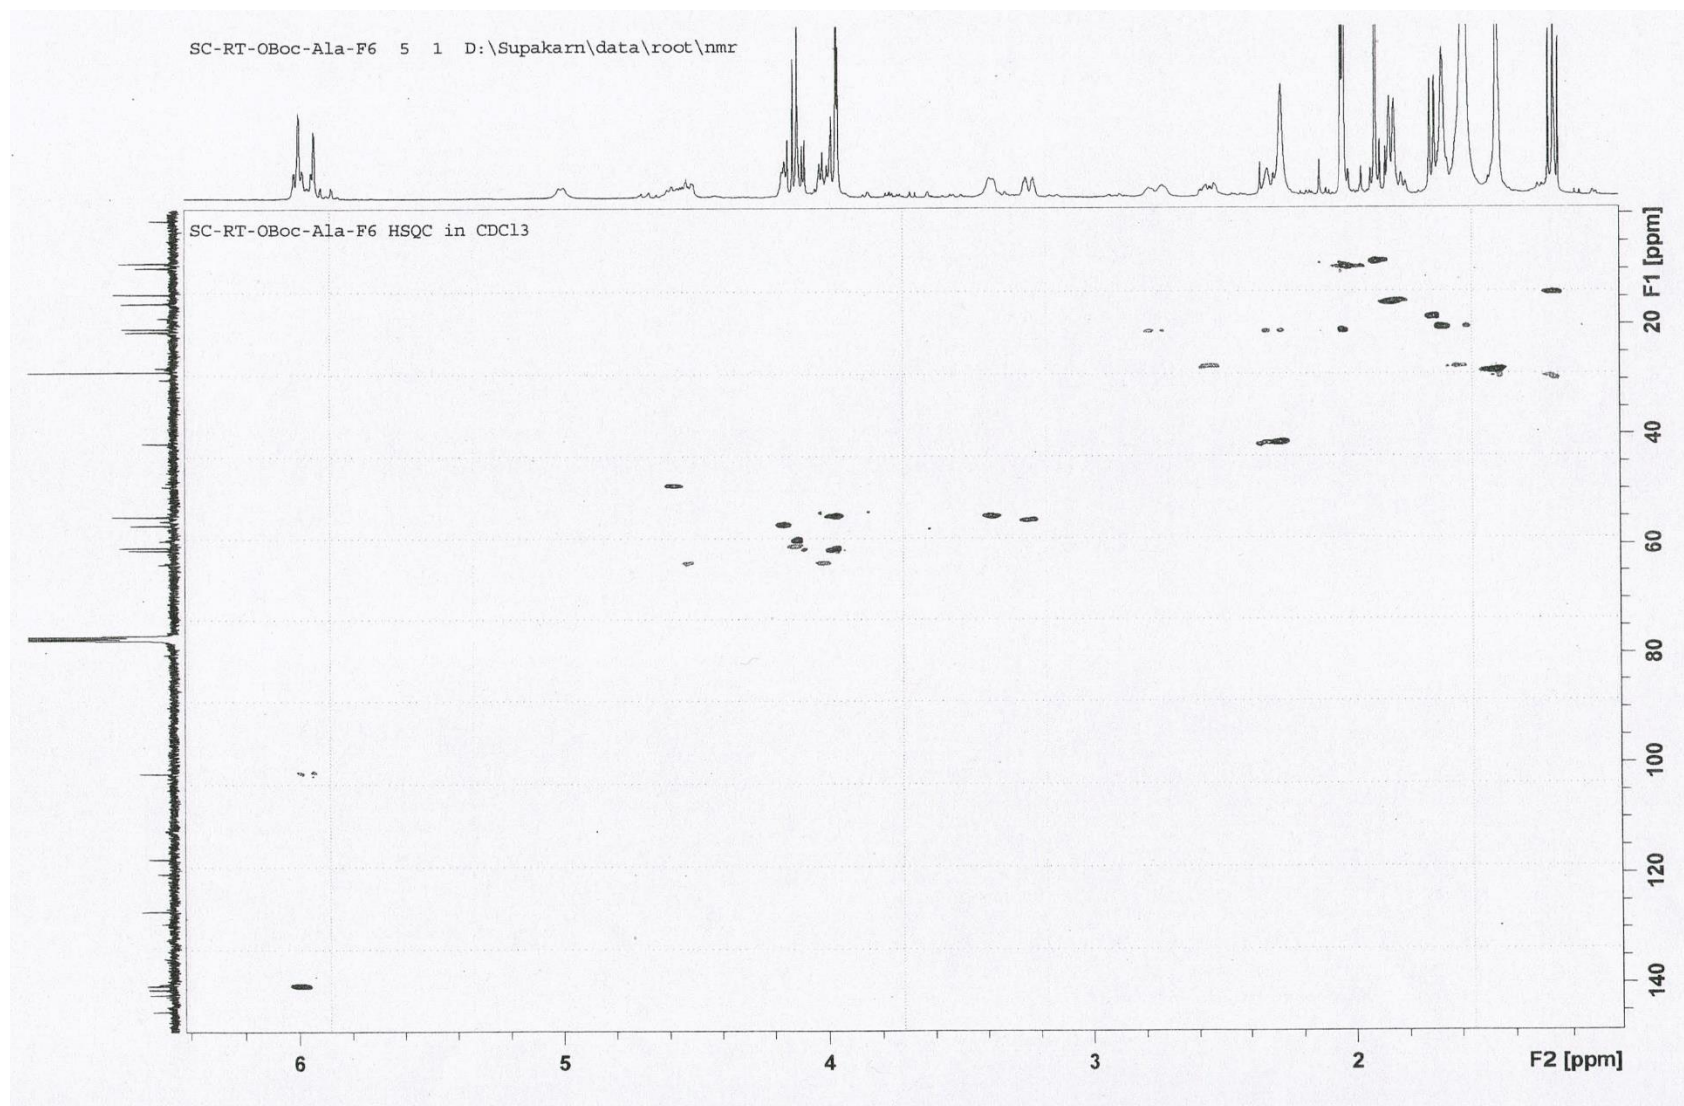

**Figure S4.** HSQC (400 MHz) spectrum of 5-*O*-(*N*-Boc-L-alanine)-renieramycin T in CDCl<sub>3</sub>

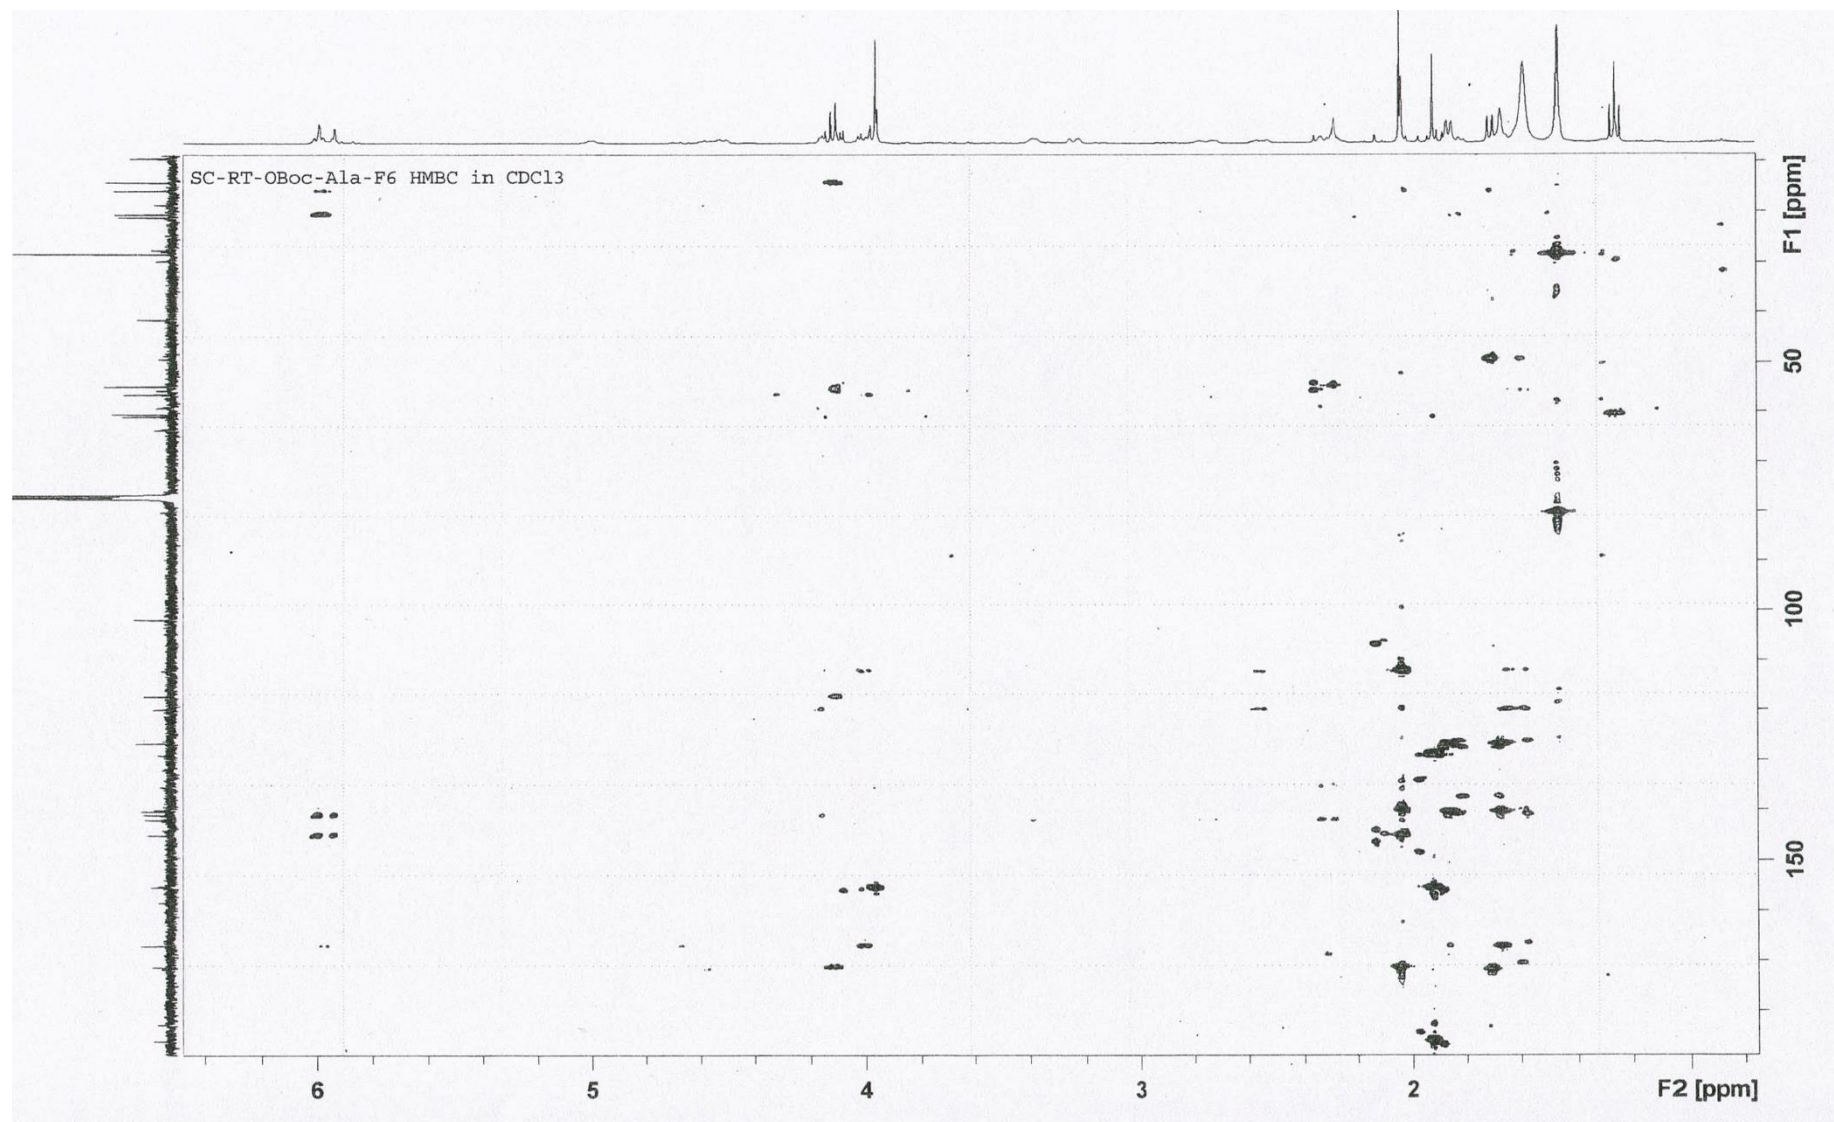

Figure S5. HMBC (400 MHz) spectrum of 5-*O*-(*N*-Boc-*L*-alanine)-renieramycin T in CDCl<sub>3</sub>
